# Supplementary material for: Interleukins 6 and 15 Levels Are Higher in Subcutaneous Adipose Tissue, but Obesity Is Associated with Their Increased Content in Visceral Fat Depots
Source: MDPI journal article supplement (doi:10.3390/ijms161025817), 2015-10-28
Supplement: s1 [file s1]

## Supplementary Information

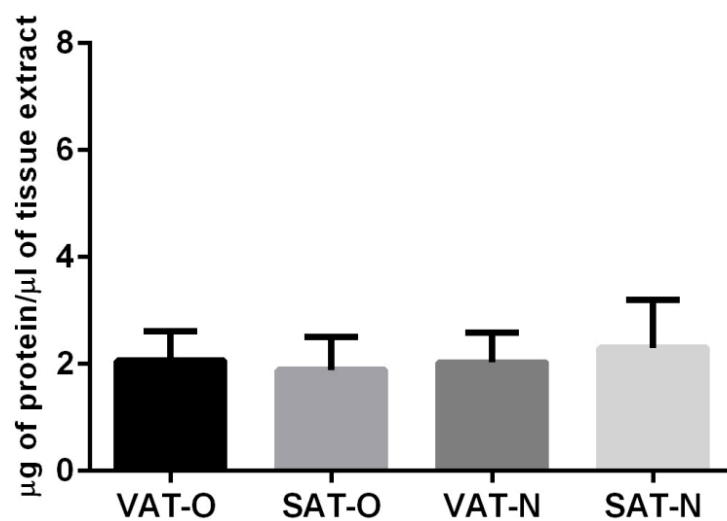

**Figure S1.** Mean total protein concentrations in visceral (VAT) and subcutaneous (SAT) adipose tissues extracts from obese (O) and normal-weight (N) individuals.
